# Supplementary material
Source: PubMed Central journal article supplement (PMC7655621)
Supplement: NIHMS1607605-supplement-1.pdf [file NIHMS1607605-supplement-1.pdf]

## Contents

|                                                                                                                                                          |      |
|----------------------------------------------------------------------------------------------------------------------------------------------------------|------|
| <b>Supplementary Figures</b> .....                                                                                                                       | 2    |
| Supplementary Figure 1. ZIKV stock production.....                                                                                                       | 2    |
| Supplementary Figure 2. Frequency of ZIKV E-reactive memory B cells identified for previously infected subjects.....                                     | 3    |
| Supplementary Figure 3. Rapid RTCA screening for neutralizing activity of mAbs to identify lead candidates for <i>in vivo</i> protection studies.....    | 4-5  |
| Supplementary Figure 4. Large-scale production and qualification of ZIKV-753 and ZIKV-893 RNAs.....                                                      | 6    |
| <b>Supplementary Tables</b> .....                                                                                                                        | 7    |
| Supplementary Table 1. Research subject demographics and ZIKV exposure history.....                                                                      | 7    |
| Supplementary Table 2. Summary of antibody discovery approaches and characterization assays .....                                                        | 8-12 |
| Supplementary Table 3. Inferred antibody germline genes and variable region analysis of selected lead candidates that tested <i>in vivo</i> in mice..... | 13   |
| Supplementary Table 4. Efficacy of mAb-encoding RNA formulation and IgG protein treatment against ZIKV <i>in vivo</i> in mice.....                       | 14   |
| <b>Supplementary References</b> .....                                                                                                                    | 15   |

## Supplementary Figures

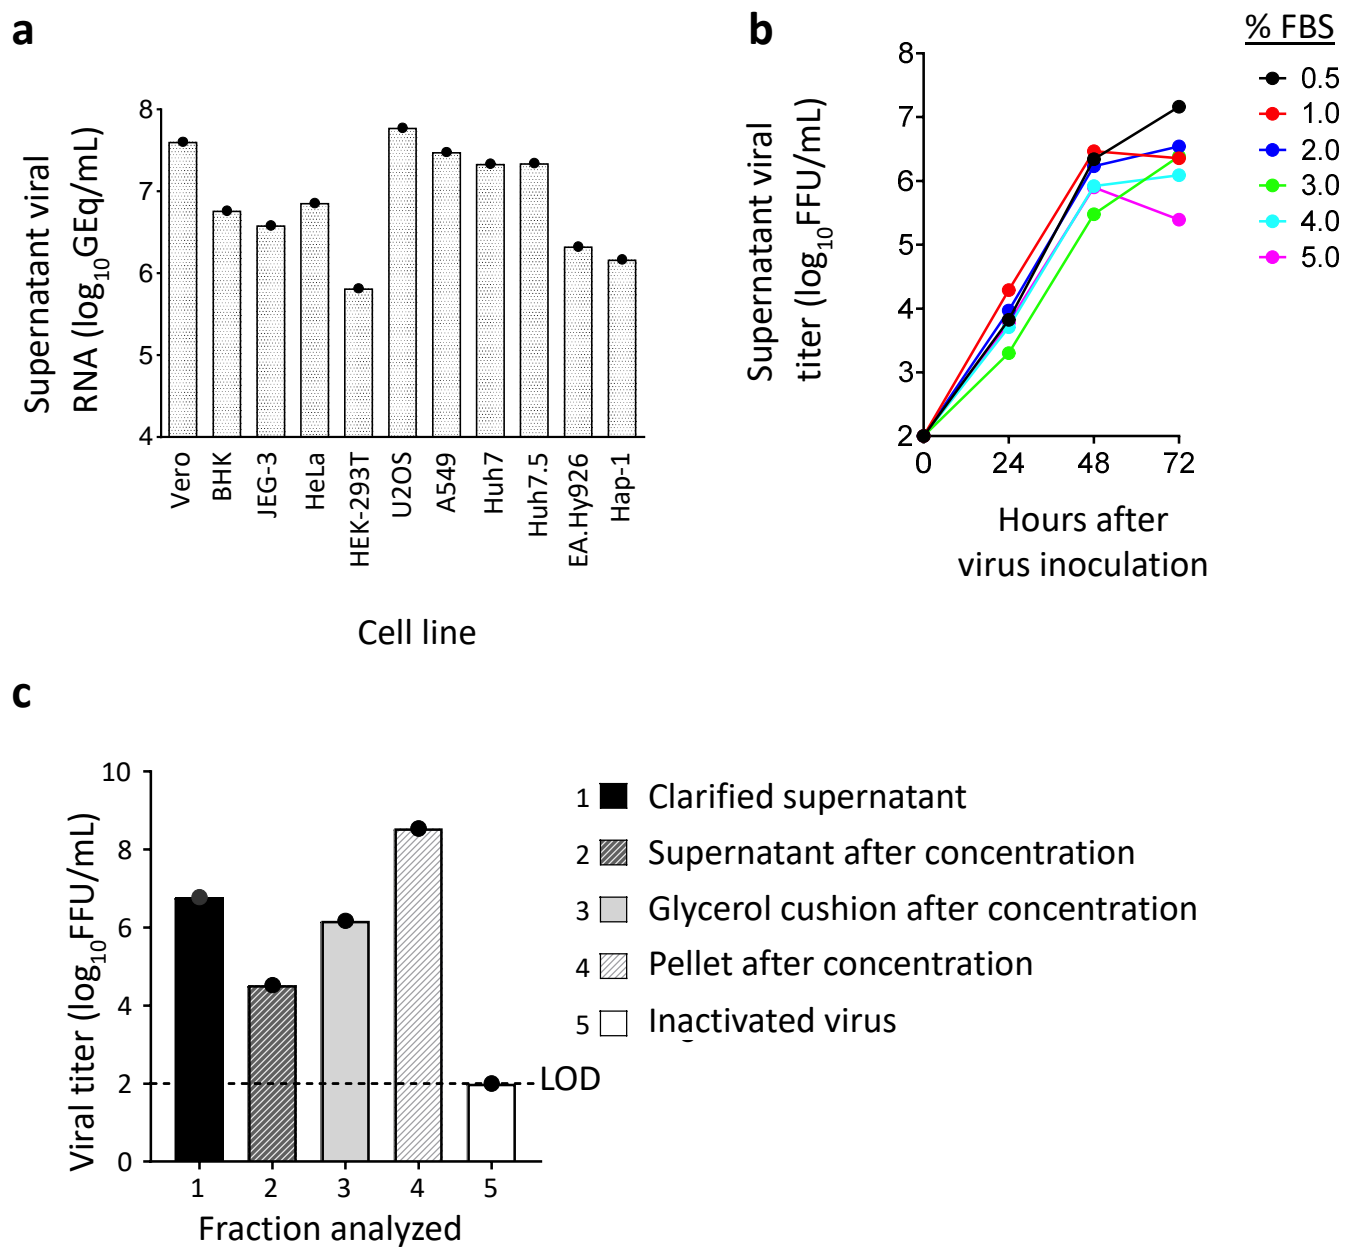

### Supplementary Figure 1. ZIKV stock production.

**(a)** Propagation of ZIKV Dakar MA was assessed in a panel of immortalized cell lines. Viral growth was assessed by qRT-PCR from clarified cell culture supernatants harvested 72 hrs after virus inoculation. Data represented a single measurement from one experiment. **(b)** Propagation of ZIKV Dakar MA in Vero cells grown in roller bottles was determined at various FBS concentrations. Viral growth was measured by FFA of culture supernatants. Data represented mean  $\pm$  SD values of technical duplicates from a single experiment. **(c)** Concentration and inactivation of ZIKV Dakar MA was assessed in indicated fractions obtained after ultra-centrifugation of infected Vero cell culture supernatant (72 hrs after virus inoculation), as well as following treatment with hydrogen peroxide. Viral titer was measured by FFA. LOD was 100 FFU/mL. Data represented a single measurement from one experiment.

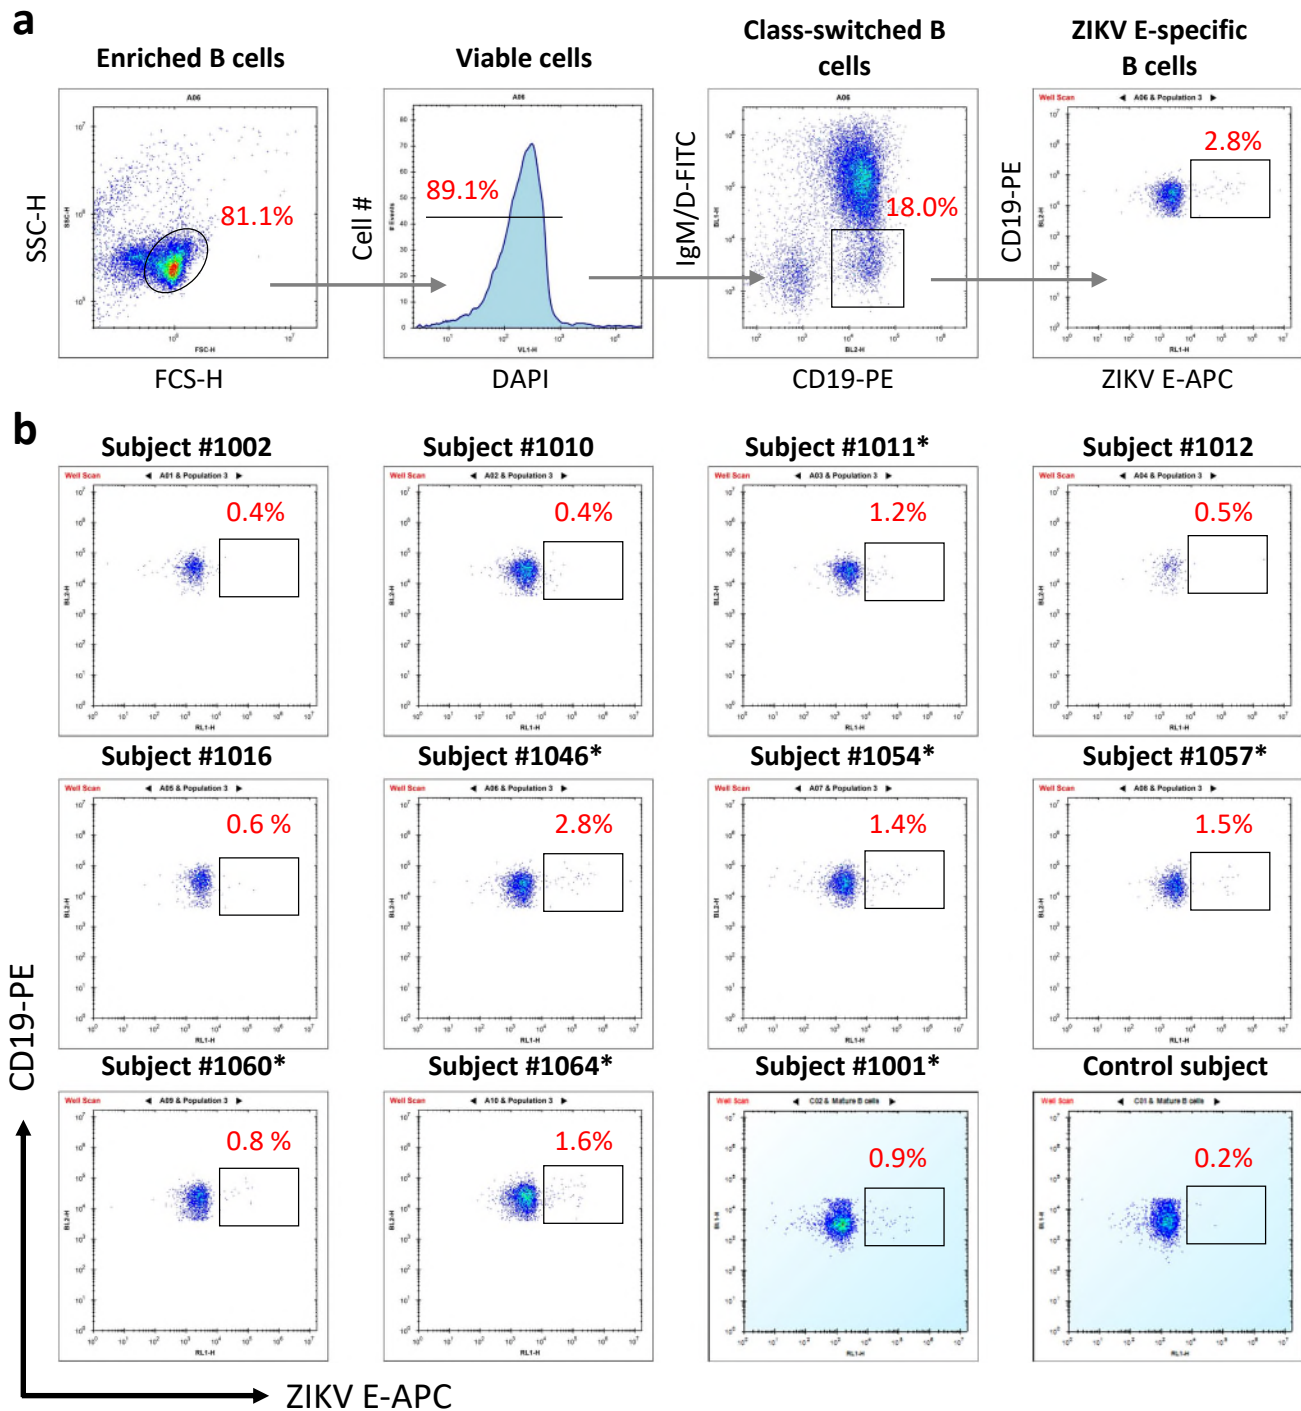

**Supplementary Figure 2. Frequency of ZIKV E-reactive memory B cells identified from previously infected subjects. (a)** Flow cytometric identification of target-specific B cells after labeling of magnetically enriched total B cells with phenotyping antibodies, biotinylated ZIKV E protein, and fluorochrome-conjugated streptavidin (see **Methods**). **(b)** Percent (%) of ZIKV E-reactive B cells from each subject was assessed by analytical flow cytometry using an iQue Plus Screener flow cytometer. Up to 10,000 enriched B cells were analyzed for each subject. Plots represent viable CD19<sup>+</sup>IgM<sup>-</sup>IgD<sup>-</sup> population and are gated as in **a**. Subject with no history for ZIKV exposure served as a control for background E protein staining, and subject #1001 described previously<sup>1</sup> served as a positive control for E protein staining (blue background plots). Seven subjects selected for ZIKV-specific mAb discovery are indicated with “\*” symbol.

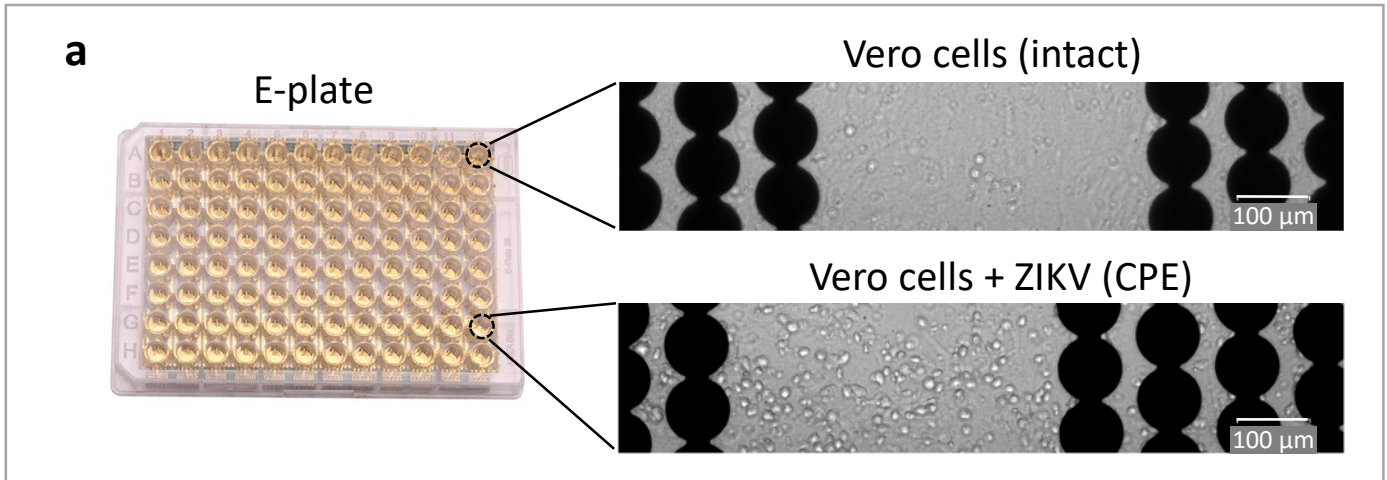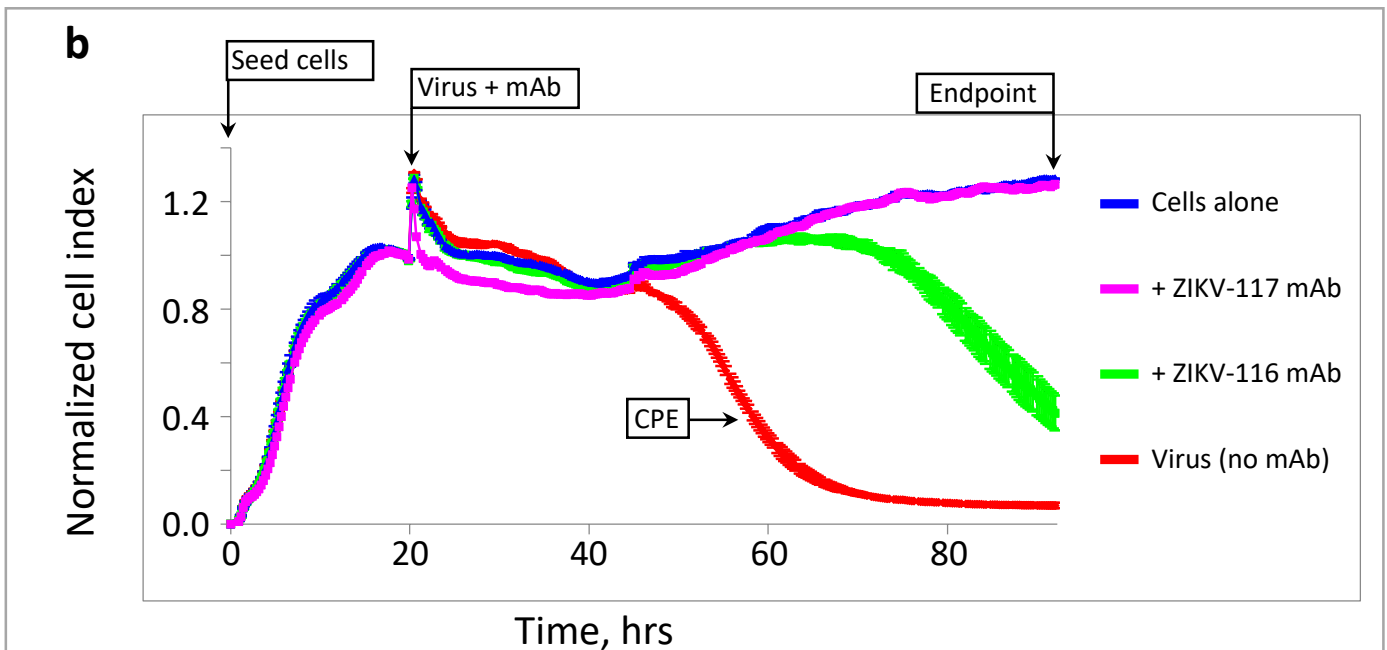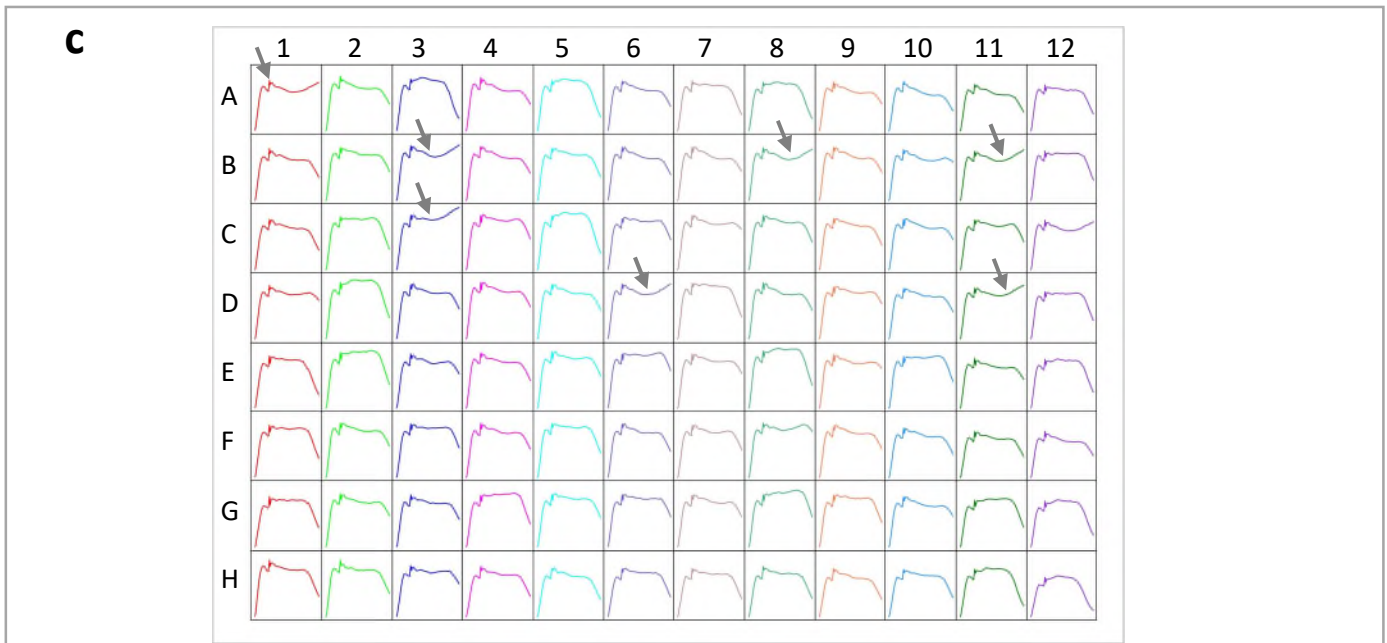

**Supplementary Figure 3. Rapid RTCA screening for neutralizing activity of mAbs to identify lead candidates for *in vivo* protection studies.**

**(a)** Enlarged brightfield image (right) of shadowed electrodes and adherent Vero cells (with or without virus to visualize CPE) from single wells of 96-well E-plates (left). Single well Vero cell images are representative of five or more images taken for each condition. **(b)** Representative sensograms for Vero cells that were inoculated with ZIKV (Brazil strain) in the presence of fully neutralizing ZIKV-117 (magenta) and partially neutralizing ZIKV-116 (green). mAbs ZIKV-117 and ZIKV-116 were described previously<sup>1</sup>. Uninfected cells (blue) and infected cells without antibody addition (red) served as controls for intact monolayer and full CPE, respectively. Data represented mean  $\pm$  SD values of technical duplicates. **(c)** Example sensograms from one 96-well E-plate analysis showing rapid identification of mAbs that fully neutralize ZIKV (indicated with grey arrows). Neutralization was assessed for 1:25 micro-scale purified mAbs dilution (see **Methods**) using ZIKV Brazil strain. Plates were measured continuously for 45 hrs after applying virus and mAb mixtures to the Vero cell monolayers.

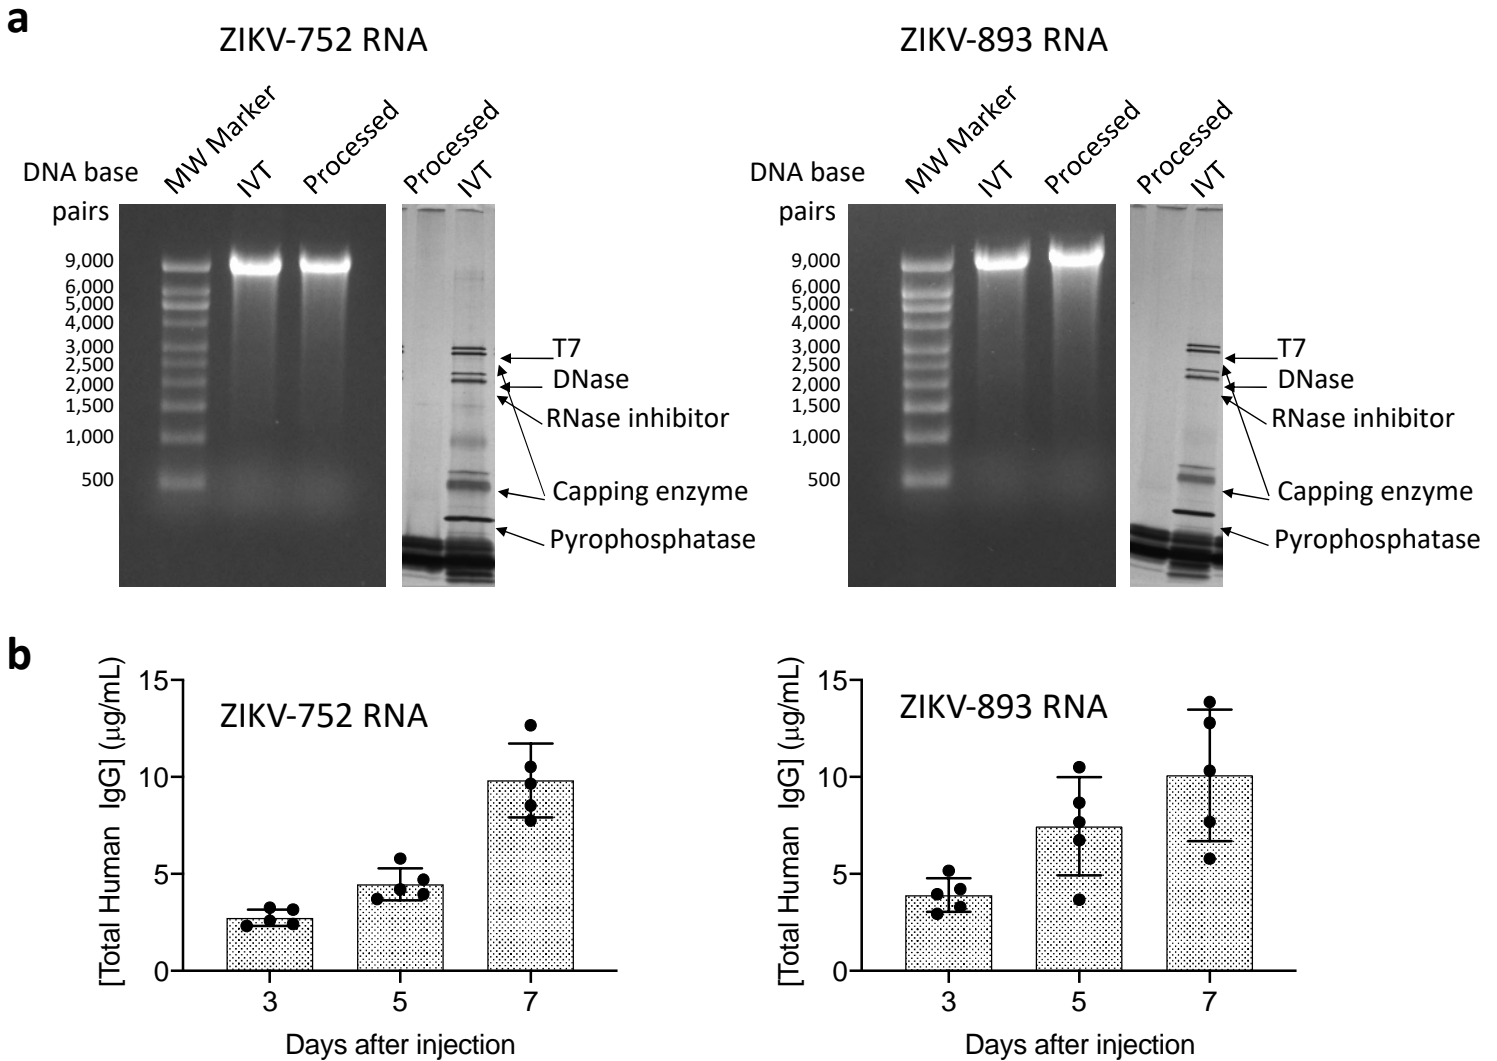

**Supplementary Figure 4. Large-scale production and qualification of ZIKV-753 and ZIKV-893 RNAs.**

**(a)** Quality and purity of large-scale produced RNA. Following large-scale *in vitro* transcription (IVT) and capping, ZIKV-752 and ZIKV-893 RNA were purified and concentrated by Capto Core chromatography and tangential flow filtration, prior to sterile-filtration and storage at  $-80^{\circ}\text{C}$ . ZIKV-752 and -893 RNA were analyzed by denaturing gel electrophoresis as well as silver-stain SDS-PAGE to assess quality and purity of post-processed RNA. The experiment was repeated independently at least three times and for several post-processed RNA preparations with similar results in addition to ZIKV-752 and -893 analysis shown here **(b)** Human IgG concentration in mouse plasma after RNA delivery. To verify function, processed ZIKV-752 and -893 were formulated with NLC, and  $40\ \mu\text{g}$  of formulation was injected intramuscularly into C57BL/6 mice ( $n=5$  mice per group). Blood was collected on days 3, 5, and 7, and concentrations of total human IgG protein were determined in serum by ELISA using recombinant ZIKV-752 and -893 mAbs to generate a standard curve. Dots show measurements from individual mice and mean  $\pm$  SD values are shown.

## Supplementary Tables

**Supplementary Table 1. Research subject demographics and ZIKV exposure history.**

| Subject ID | Gender | Age | Ethnicity              | ZIKV strain lineage* | Year infected | Country in which infection occurred | PBMCs collection timepoint              |
|------------|--------|-----|------------------------|----------------------|---------------|-------------------------------------|-----------------------------------------|
| 1001**     | Male   | 41  | Hispanic or Latino     | Asian                | 2015          | Brazil                              | 7 months after infection                |
| 1011**     | Female | 25  | Not Hispanic or Latino | Asian                | 2016          | Haiti                               | March 2016                              |
| 1046**     | Female | 58  | Hispanic or Latino     | Asian                | 2016          | Dominican Republic                  | >90 days after infection                |
| 1054**     | Female | 62  | Not Hispanic or Latino | Asian                | 2016          | Puerto Rico                         | >90 days after infection                |
| 1057**     | Male   | 40  | Not Hispanic or Latino | Asian                | 2016          | Nicaragua                           | 5 weeks and six months post 1st symptom |
| 1060**     | Female | 35  | Not Hispanic or Latino | Asian                | 2016          | Guatemala                           | >90 days after infection                |
| 1064**     | Male   | 19  | Not Hispanic or Latino | Asian                | 2016          | Guatemala                           | >90 days after infection                |
| 1002       | Female | 42  | Not Hispanic or Latino | Asian                | 2016          | Mexico                              | >90 days after infection                |
| 1010       | Female | 25  | Not Hispanic or Latino | Asian                | 2016          | Haiti                               | >90 days after infection                |
| 1012       | Female | 19  | Not Hispanic or Latino | Asian                | 2016          | Haiti                               | >90 days after infection                |
| 1016       | Female | 21  | Not Hispanic or Latino | Asian                | 2016          | Haiti                               | >90 days after infection                |
| 269***     | Male   | 58  | Not Hispanic or Latino | NA                   | NA            | NA                                  | NA                                      |

\* - The subjects likely had been infected with a strain of Asian lineage of ZIKV, since they contracted the disease during the recent outbreak in South America. Flavivirus immune status at the time of ZIKV infection for these subjects is unknown. \*\* - subjects selected for ZIKV-specific mAb discovery. \*\*\* -uninfected control subject. NA – not applicable.

Supplementary Table 2. Summary of antibody discovery approaches and characterization assays.

| Clone ID   | *Starting method to isolate mAb | Microscale-purified mAb analysis to identify candidates for <i>in vivo</i> study |                                                                                            |                                                                                  |                                                                         |                                                                                             |                                                                                  |                                                                                 |                                                                                  |                                                                  |                                                                   |                                                            |                                                             |                                                            |                                                             |                                               | Analysis of mid-scale purified mAb that were used for <i>in vivo</i> studies |                                               |                                                            |
|------------|---------------------------------|----------------------------------------------------------------------------------|--------------------------------------------------------------------------------------------|----------------------------------------------------------------------------------|-------------------------------------------------------------------------|---------------------------------------------------------------------------------------------|----------------------------------------------------------------------------------|---------------------------------------------------------------------------------|----------------------------------------------------------------------------------|------------------------------------------------------------------|-------------------------------------------------------------------|------------------------------------------------------------|-------------------------------------------------------------|------------------------------------------------------------|-------------------------------------------------------------|-----------------------------------------------|------------------------------------------------------------------------------|-----------------------------------------------|------------------------------------------------------------|
|            |                                 | **Purified mAb yield (µg)                                                        | ***ELISA binding O.D. 450 nm to ZIKV E2 assessed for 1:10 CHO culture supernatant dilution | ***ELISA binding O.D. 450 nm to ZIKV E2 assessed for 1:100 purified mAb dilution | ****Antigenic site determined by competition binding with reference mAb | ZIKV Brazil neutralization assessed by RTCA for 1:10 CHO culture supernatant dilution (+/-) | ZIKV Brazil neutralization assessed by RTCA for 1:25 purified mAb dilution (+/-) | ZIKV Dakar neutralization assessed by FRIT for 1:16 purified mAb dilution (+/-) | ZIKV Brazil neutralization assessed by FRIT for 1:16 purified mAb dilution (+/-) | ZIKV Dakar neutralization assessed by RTCA for neutralizing mAbs | ZIKV Brazil neutralization assessed by RTCA for neutralizing mAbs | ZIKV Dakar IC50 (ng/mL) assessed by RTCA for purified mAbs | ZIKV Brazil IC50 (ng/mL) assessed by FRIT for purified mAbs | ZIKV Dakar IC50 (ng/mL) assessed by FRIT for purified mAbs | ZIKV Brazil IC50 (ng/mL) assessed by FRIT for purified mAbs | ****ADCP assessed for purified mAbs (Z-score) | ****ADNP assessed for purified mAbs (Z-score)                                | ****ADCO assessed for purified mAbs (Z-score) | ZIKV Dakar IC50 (ng/mL) assessed by RTCA for purified mAbs |
| 30v17 vsm1 | -                               | 230                                                                              | 3.4                                                                                        | 4.2                                                                              | NO                                                                      | +                                                                                           | +                                                                                | +                                                                               | +                                                                                | +                                                                | 42                                                                | 7                                                          | 34                                                          | 34                                                         | 2.3                                                         | 2.0                                           | 2.0                                                                          | NO                                            | NO                                                         |
| 30v40      | NO                              | 21                                                                               | -                                                                                          | -                                                                                | NO                                                                      | -                                                                                           | -                                                                                | -                                                                               | -                                                                                | -                                                                | NO                                                                | NO                                                         | NO                                                          | NO                                                         | 0.3                                                         | 0.4                                           | 0.2                                                                          | NO                                            | NO                                                         |
| 30v46      | NO                              | 4                                                                                | -                                                                                          | -                                                                                | NO                                                                      | -                                                                                           | -                                                                                | -                                                                               | -                                                                                | -                                                                | NO                                                                | NO                                                         | NO                                                          | NO                                                         | 0.4                                                         | 0.4                                           | 0.3                                                                          | NO                                            | NO                                                         |
| 30v47      | NO                              | 4                                                                                | -                                                                                          | -                                                                                | NO                                                                      | -                                                                                           | -                                                                                | -                                                                               | -                                                                                | -                                                                | NO                                                                | NO                                                         | NO                                                          | NO                                                         | 0.5                                                         | 0.5                                           | 0.2                                                                          | NO                                            | NO                                                         |
| 30v48      | NO                              | 25.5                                                                             | -                                                                                          | -                                                                                | NO                                                                      | -                                                                                           | -                                                                                | -                                                                               | -                                                                                | -                                                                | NO                                                                | NO                                                         | NO                                                          | NO                                                         | 0.5                                                         | 0.4                                           | 0.2                                                                          | NO                                            | NO                                                         |
| 30v50      | NO                              | 14                                                                               | -                                                                                          | -                                                                                | NO                                                                      | -                                                                                           | -                                                                                | -                                                                               | -                                                                                | -                                                                | NO                                                                | NO                                                         | NO                                                          | NO                                                         | 0.5                                                         | 0.5                                           | 0.2                                                                          | NO                                            | NO                                                         |
| 30v51      | NO                              | 4                                                                                | -                                                                                          | -                                                                                | NO                                                                      | -                                                                                           | -                                                                                | -                                                                               | -                                                                                | -                                                                | NO                                                                | NO                                                         | NO                                                          | NO                                                         | 0.5                                                         | 0.5                                           | 0.2                                                                          | NO                                            | NO                                                         |
| 30v42      | NO                              | 12                                                                               | -                                                                                          | -                                                                                | NO                                                                      | -                                                                                           | -                                                                                | -                                                                               | -                                                                                | -                                                                | NO                                                                | NO                                                         | NO                                                          | NO                                                         | 0.6                                                         | 0.4                                           | 0.2                                                                          | NO                                            | NO                                                         |
| 30v43      | NO                              | 12                                                                               | -                                                                                          | -                                                                                | NO                                                                      | -                                                                                           | -                                                                                | -                                                                               | -                                                                                | -                                                                | NO                                                                | NO                                                         | NO                                                          | NO                                                         | 0.6                                                         | 0.4                                           | 0.2                                                                          | NO                                            | NO                                                         |
| 30v44      | NO                              | 14                                                                               | -                                                                                          | -                                                                                | NO                                                                      | -                                                                                           | -                                                                                | -                                                                               | -                                                                                | -                                                                | NO                                                                | NO                                                         | NO                                                          | NO                                                         | 0.6                                                         | 0.4                                           | 0.2                                                                          | NO                                            | NO                                                         |
| 30v47      | NO                              | 8                                                                                | -                                                                                          | -                                                                                | NO                                                                      | -                                                                                           | -                                                                                | -                                                                               | -                                                                                | -                                                                | NO                                                                | NO                                                         | NO                                                          | NO                                                         | 0.5                                                         | 0.3                                           | 0.2                                                                          | NO                                            | NO                                                         |
| 30v48      | NO                              | 25                                                                               | -                                                                                          | -                                                                                | NO                                                                      | -                                                                                           | -                                                                                | -                                                                               | -                                                                                | -                                                                | NO                                                                | NO                                                         | NO                                                          | NO                                                         | 0.5                                                         | 0.3                                           | 0.2                                                                          | NO                                            | NO                                                         |
| 30v49      | NO                              | 25.5                                                                             | -                                                                                          | -                                                                                | NO                                                                      | -                                                                                           | -                                                                                | -                                                                               | -                                                                                | -                                                                | NO                                                                | NO                                                         | NO                                                          | NO                                                         | 0.6                                                         | 0.4                                           | 0.2                                                                          | NO                                            | NO                                                         |
| 30v45      | NO                              | 25.5                                                                             | -                                                                                          | -                                                                                | NO                                                                      | -                                                                                           | -                                                                                | -                                                                               | -                                                                                | -                                                                | NO                                                                | NO                                                         | NO                                                          | NO                                                         | 0.5                                                         | 0.3                                           | 0.2                                                                          | NO                                            | NO                                                         |
| 30v41      | NO                              | 104                                                                              | -                                                                                          | -                                                                                | NO                                                                      | -                                                                                           | -                                                                                | -                                                                               | -                                                                                | -                                                                | NO                                                                | NO                                                         | NO                                                          | NO                                                         | 0.3                                                         | 0.3                                           | 0.2                                                                          | NO                                            | NO                                                         |
| 30v42      | NO                              | 120                                                                              | -                                                                                          | -                                                                                | NO                                                                      | -                                                                                           | -                                                                                | -                                                                               | -                                                                                | -                                                                | NO                                                                | NO                                                         | NO                                                          | NO                                                         | 0.3                                                         | 0.3                                           | 0.2                                                                          | NO                                            | NO                                                         |
| 30v43      | NO                              | 111                                                                              | 3.0                                                                                        | 4.2                                                                              | 116                                                                     | +                                                                                           | +                                                                                | +                                                                               | +                                                                                | +                                                                | NO                                                                | NO                                                         | 1,212                                                       | 0.3                                                        | 0.3                                                         | 0.2                                           | >3,000                                                                       | 305                                           |                                                            |
| 30v44      | NO                              | 48                                                                               | -                                                                                          | -                                                                                | NO                                                                      | -                                                                                           | -                                                                                | -                                                                               | -                                                                                | -                                                                | NO                                                                | NO                                                         | NO                                                          | NO                                                         | 0.3                                                         | 0.3                                           | 0.2                                                                          | NO                                            | NO                                                         |
| 30v45      | NO                              | 17                                                                               | -                                                                                          | -                                                                                | NO                                                                      | -                                                                                           | -                                                                                | -                                                                               | -                                                                                | -                                                                | NO                                                                | NO                                                         | NO                                                          | NO                                                         | 0.3                                                         | 0.3                                           | 0.2                                                                          | NO                                            | NO                                                         |
| 30v46      | NO                              | 8                                                                                | -                                                                                          | -                                                                                | NO                                                                      | -                                                                                           | -                                                                                | -                                                                               | -                                                                                | -                                                                | NO                                                                | NO                                                         | NO                                                          | NO                                                         | 0.3                                                         | 0.3                                           | 0.2                                                                          | NO                                            | NO                                                         |
| 30v47      | NO                              | 25.5                                                                             | -                                                                                          | -                                                                                | NO                                                                      | -                                                                                           | -                                                                                | -                                                                               | -                                                                                | -                                                                | NO                                                                | NO                                                         | NO                                                          | NO                                                         | 0.4                                                         | 0.4                                           | 0.2                                                                          | NO                                            | NO                                                         |
| 30v48      | NO                              | 12                                                                               | -                                                                                          | -                                                                                | NO                                                                      | -                                                                                           | -                                                                                | -                                                                               | -                                                                                | -                                                                | NO                                                                | NO                                                         | NO                                                          | NO                                                         | 0.4                                                         | 0.4                                           | 0.2                                                                          | NO                                            | NO                                                         |
| 30v49      | Sub-panel 1                     | 25.5                                                                             | -                                                                                          | -                                                                                | NO                                                                      | -                                                                                           | -                                                                                | -                                                                               | -                                                                                | -                                                                | NO                                                                | NO                                                         | NO                                                          | NO                                                         | 0.4                                                         | 0.4                                           | 0.2                                                                          | NO                                            | NO                                                         |
| 30v42      | NO                              | 25.5                                                                             | -                                                                                          | -                                                                                | NO                                                                      | -                                                                                           | -                                                                                | -                                                                               | -                                                                                | -                                                                | NO                                                                | NO                                                         | NO                                                          | NO                                                         | 0.2                                                         | 0.2                                           | 0.2                                                                          | NO                                            | NO                                                         |
| 30v43      | NO                              | 1                                                                                | -                                                                                          | -                                                                                | NO                                                                      | -                                                                                           | -                                                                                | -                                                                               | -                                                                                | -                                                                | NO                                                                | NO                                                         | NO                                                          | NO                                                         | 0.2                                                         | 0.2                                           | 0.2                                                                          | NO                                            | NO                                                         |
| 30v44      | NO                              | 12                                                                               | -                                                                                          | -                                                                                | NO                                                                      | -                                                                                           | -                                                                                | -                                                                               | -                                                                                | -                                                                | NO                                                                | NO                                                         | NO                                                          | NO                                                         | 0.2                                                         | 0.2                                           | 0.2                                                                          | NO                                            | NO                                                         |
| 30v45      | NO                              | 12                                                                               | 3.7                                                                                        | 4.2                                                                              | FL                                                                      | -                                                                                           | -                                                                                | -                                                                               | -                                                                                | -                                                                | NO                                                                | NO                                                         | NO                                                          | NO                                                         | 1.4                                                         | 1.2                                           | 0.2                                                                          | 112                                           | 308                                                        |
| 30v47      | Sub-panel 2                     | 200                                                                              | -                                                                                          | -                                                                                | NO                                                                      | -                                                                                           | -                                                                                | -                                                                               | -                                                                                | -                                                                | NO                                                                | NO                                                         | NO                                                          | NO                                                         | 0.3                                                         | 0.3                                           | 0.2                                                                          | NO                                            | NO                                                         |
| 30v48      | NO                              | 20                                                                               | -                                                                                          | -                                                                                | NO                                                                      | -                                                                                           | -                                                                                | -                                                                               | -                                                                                | -                                                                | NO                                                                | NO                                                         | NO                                                          | NO                                                         | 0.3                                                         | 0.3                                           | 0.2                                                                          | NO                                            | NO                                                         |
| 30v49      | Sub-panel 1                     | 27                                                                               | 3.1                                                                                        | 4.1                                                                              | Unknown                                                                 | -                                                                                           | -                                                                                | -                                                                               | -                                                                                | -                                                                | NO                                                                | NO                                                         | NO                                                          | NO                                                         | 0.3                                                         | 0.3                                           | 0.2                                                                          | NO                                            | NO                                                         |
| 30v40      | NO                              | 40                                                                               | -                                                                                          | -                                                                                | NO                                                                      | -                                                                                           | -                                                                                | -                                                                               | -                                                                                | -                                                                | NO                                                                | NO                                                         | NO                                                          | NO                                                         | 0.4                                                         | 0.4                                           | 0.2                                                                          | NO                                            | NO                                                         |
| 30v41      | NO                              | 10                                                                               | -                                                                                          | -                                                                                | NO                                                                      | -                                                                                           | -                                                                                | -                                                                               | -                                                                                | -                                                                | NO                                                                | NO                                                         | NO                                                          | NO                                                         | 0.4                                                         | 0.4                                           | 0.2                                                                          | NO                                            | NO                                                         |
| 30v42      | NO                              | 10                                                                               | -                                                                                          | -                                                                                | NO                                                                      | -                                                                                           | -                                                                                | -                                                                               | -                                                                                | -                                                                | NO                                                                | NO                                                         | NO                                                          | NO                                                         | 0.4                                                         | 0.4                                           | 0.2                                                                          | NO                                            | NO                                                         |
| 30v43      | Sub-panel 1                     | 1                                                                                | -                                                                                          | -                                                                                | NO                                                                      | -                                                                                           | -                                                                                | -                                                                               | -                                                                                | -                                                                | NO                                                                | NO                                                         | NO                                                          | NO                                                         | 0.5                                                         | 0.5                                           | 0.2                                                                          | NO                                            | NO                                                         |
| 30v46      | NO                              | 6                                                                                | -                                                                                          | -                                                                                | NO                                                                      | -                                                                                           | -                                                                                | -                                                                               | -                                                                                | -                                                                | NO                                                                | NO                                                         | NO                                                          | NO                                                         | 0.4                                                         | 0.4                                           | 0.2                                                                          | NO                                            | NO                                                         |
| 30v47      | NO                              | 25.5                                                                             | -                                                                                          | -                                                                                | NO                                                                      | -                                                                                           | -                                                                                | -                                                                               | -                                                                                | -                                                                | NO                                                                | NO                                                         | NO                                                          | NO                                                         | 0.3                                                         | 0.3                                           | 0.2                                                                          | NO                                            | NO                                                         |
| 30v48      | NO                              | 12                                                                               | -                                                                                          | -                                                                                | NO                                                                      | -                                                                                           | -                                                                                | -                                                                               | -                                                                                | -                                                                | NO                                                                | NO                                                         | NO                                                          | NO                                                         | 0.4                                                         | 0.4                                           | 0.2                                                                          | NO                                            | NO                                                         |
| 30v49      | Sub-panel 1                     | 25.5                                                                             | -                                                                                          | -                                                                                | NO                                                                      | -                                                                                           | -                                                                                | -                                                                               | -                                                                                | -                                                                | NO                                                                | NO                                                         | NO                                                          | NO                                                         | 0.5                                                         | 0.5                                           | 0.2                                                                          | NO                                            | NO                                                         |
| 30v42      | NO                              | 11                                                                               | -                                                                                          | -                                                                                | NO                                                                      | -                                                                                           | -                                                                                | -                                                                               | -                                                                                | -                                                                | NO                                                                | NO                                                         | NO                                                          | NO                                                         | 0.3                                                         | 0.3                                           | 0.2                                                                          | NO                                            | NO                                                         |
| 30v43      | NO                              | 40                                                                               | -                                                                                          | -                                                                                | NO                                                                      | -                                                                                           | -                                                                                | -                                                                               | -                                                                                | -                                                                | NO                                                                | NO                                                         | NO                                                          | NO                                                         | 0.5                                                         | 0.5                                           | 0.2                                                                          | NO                                            | NO                                                         |
| 30v44      | NO                              | 10                                                                               | -                                                                                          | -                                                                                | NO                                                                      | -                                                                                           | -                                                                                | -                                                                               | -                                                                                | -                                                                | NO                                                                | NO                                                         | NO                                                          | NO                                                         | 0.5                                                         | 0.5                                           | 0.2                                                                          | NO                                            | NO                                                         |
| 30v45      | NO                              | 10                                                                               | -                                                                                          | -                                                                                | NO                                                                      | -                                                                                           | -                                                                                | -                                                                               | -                                                                                | -                                                                | NO                                                                | NO                                                         | NO                                                          | NO                                                         | 0.5                                                         | 0.5                                           | 0.2                                                                          | NO                                            | NO                                                         |
| 30v46      | NO                              | 10                                                                               | -                                                                                          | -                                                                                | NO                                                                      | -                                                                                           | -                                                                                | -                                                                               | -                                                                                | -                                                                | NO                                                                | NO                                                         | NO                                                          | NO                                                         | 0.5                                                         | 0.5                                           | 0.2                                                                          | NO                                            | NO                                                         |
| 30v47      | NO                              | 10                                                                               | -                                                                                          | -                                                                                | NO                                                                      | -                                                                                           | -                                                                                | -                                                                               | -                                                                                | -                                                                | NO                                                                | NO                                                         | NO                                                          | NO                                                         | 0.5                                                         | 0.5                                           | 0.2                                                                          | NO                                            | NO                                                         |
| 30v48      | NO                              | 10                                                                               | -                                                                                          | -                                                                                | NO                                                                      | -                                                                                           | -                                                                                | -                                                                               | -                                                                                | -                                                                | NO                                                                | NO                                                         | NO                                                          | NO                                                         | 0.5                                                         | 0.5                                           | 0.2                                                                          | NO                                            | NO                                                         |
| 30v49      | NO                              | 10                                                                               | -                                                                                          | -                                                                                | NO                                                                      | -                                                                                           | -                                                                                | -                                                                               | -                                                                                | -                                                                | NO                                                                | NO                                                         | NO                                                          | NO                                                         | 0.5                                                         | 0.5                                           | 0.2                                                                          | NO                                            | NO                                                         |
| 30v40      | NO                              | 10                                                                               | -                                                                                          | -                                                                                | NO                                                                      | -                                                                                           | -                                                                                | -                                                                               | -                                                                                | -                                                                | NO                                                                | NO                                                         | NO                                                          | NO                                                         | 0.5                                                         | 0.5                                           | 0.2                                                                          | NO                                            | NO                                                         |
| 30v41      | NO                              | 10                                                                               | -                                                                                          | -                                                                                | NO                                                                      | -                                                                                           | -                                                                                | -                                                                               | -                                                                                | -                                                                | NO                                                                | NO                                                         | NO                                                          | NO                                                         | 0.5                                                         | 0.5                                           | 0.2                                                                          | NO                                            | NO                                                         |
| 30v42      | NO                              | 10                                                                               | -                                                                                          | -                                                                                | NO                                                                      | -                                                                                           | -                                                                                | -                                                                               | -                                                                                | -                                                                | NO                                                                | NO                                                         | NO                                                          | NO                                                         | 0.5                                                         | 0.5                                           | 0.2                                                                          | NO                                            | NO                                                         |
| 30v43      | NO                              | 10                                                                               | -                                                                                          | -                                                                                | NO                                                                      | -                                                                                           | -                                                                                | -                                                                               | -                                                                                | -                                                                | NO                                                                | NO                                                         | NO                                                          | NO                                                         | 0.5                                                         | 0.5                                           | 0.2                                                                          | NO                                            | NO                                                         |
| 30v44      | NO                              | 10                                                                               | -                                                                                          | -                                                                                | NO                                                                      | -                                                                                           | -                                                                                | -                                                                               | -                                                                                | -                                                                | NO                                                                | NO                                                         | NO                                                          | NO                                                         | 0.5                                                         | 0.5                                           | 0.2                                                                          | NO                                            | NO                                                         |
| 30v45      | NO                              | 10                                                                               | -                                                                                          | -                                                                                | NO                                                                      | -                                                                                           | -                                                                                | -                                                                               | -                                                                                | -                                                                | NO                                                                | NO                                                         | NO                                                          | NO                                                         | 0.5                                                         | 0.5                                           | 0.2                                                                          | NO                                            | NO                                                         |
| 30v46      | NO                              | 10                                                                               | -                                                                                          | -                                                                                | NO                                                                      | -                                                                                           | -                                                                                | -                                                                               | -                                                                                | -                                                                | NO                                                                | NO                                                         | NO                                                          | NO                                                         | 0.5                                                         | 0.5                                           | 0.2                                                                          | NO                                            | NO                                                         |
| 30v47      | NO                              | 10                                                                               | -                                                                                          | -                                                                                | NO                                                                      | -                                                                                           | -                                                                                | -                                                                               | -                                                                                | -                                                                | NO                                                                | NO                                                         | NO                                                          | NO                                                         | 0.5                                                         | 0.5                                           | 0.2                                                                          | NO                                            | NO                                                         |
| 30v48      | NO                              | 10                                                                               | -                                                                                          | -                                                                                | NO                                                                      | -                                                                                           | -                                                                                | -                                                                               | -                                                                                | -                                                                | NO                                                                | NO                                                         | NO                                                          | NO                                                         | 0.5                                                         | 0.5                                           | 0.2                                                                          | NO                                            | NO                                                         |
| 30v49      | NO                              | 10                                                                               | -                                                                                          | -                                                                                | NO                                                                      | -                                                                                           | -                                                                                | -                                                                               | -                                                                                | -                                                                | NO                                                                | NO                                                         | NO                                                          | NO                                                         | 0.5                                                         | 0.5                                           | 0.2                                                                          | NO                                            | NO                                                         |
| 30v40      | NO                              | 10                                                                               | -                                                                                          | -                                                                                | NO                                                                      | -                                                                                           | -                                                                                | -                                                                               | -                                                                                | -                                                                | NO                                                                | NO                                                         | NO                                                          | NO                                                         | 0.5                                                         | 0.5                                           | 0.2                                                                          | NO                                            | NO                                                         |
| 30v41      | NO                              | 10                                                                               | -                                                                                          | -                                                                                | NO                                                                      | -                                                                                           | -                                                                                | -                                                                               | -                                                                                | -                                                                | NO                                                                | NO                                                         | NO                                                          | NO                                                         | 0.5                                                         | 0.5                                           | 0.2                                                                          | NO                                            | NO                                                         |
| 30v42      | NO                              | 10                                                                               | -                                                                                          | -                                                                                | NO                                                                      | -                                                                                           | -                                                                                | -                                                                               | -                                                                                | -                                                                | NO                                                                | NO                                                         | NO                                                          | NO                                                         | 0.5                                                         | 0.5                                           | 0.2                                                                          | NO                                            | NO                                                         |
| 30v43      | NO                              | 10                                                                               | -                                                                                          | -                                                                                | NO                                                                      | -                                                                                           | -                                                                                | -                                                                               | -                                                                                | -                                                                | NO                                                                | NO                                                         | NO                                                          | NO                                                         | 0.5                                                         | 0.5                                           | 0.2                                                                          | NO                                            | NO                                                         |
| 30v44      | NO                              | 10                                                                               | -                                                                                          | -                                                                                | NO                                                                      | -                                                                                           | -                                                                                | -                                                                               | -                                                                                | -                                                                | NO                                                                | NO                                                         | NO                                                          | NO                                                         | 0.5                                                         | 0.5                                           | 0.2                                                                          | NO                                            | NO                                                         |
| 30v45      | NO                              | 10                                                                               | -                                                                                          | -                                                                                | NO                                                                      | -                                                                                           | -                                                                                | -                                                                               | -                                                                                | -                                                                | NO                                                                | NO                                                         | NO                                                          | NO                                                         | 0.5                                                         | 0.5                                           | 0.2                                                                          | NO                                            | NO                                                         |
| 30v46      | NO                              | 10                                                                               | -                                                                                          | -                                                                                | NO                                                                      | -                                                                                           | -                                                                                | -                                                                               | -                                                                                | -                                                                | NO                                                                | NO                                                         | NO                                                          | NO                                                         | 0.5                                                         | 0.5                                           | 0.2                                                                          | NO                                            | NO                                                         |
| 30v47      | NO                              | 10                                                                               | -                                                                                          | -                                                                                | NO                                                                      | -                                                                                           | -                                                                                | -                                                                               | -                                                                                | -                                                                | NO                                                                | NO                                                         | NO                                                          | NO                                                         | 0.5                                                         | 0.5                                           | 0.2                                                                          | NO                                            | NO                                                         |
| 30v48      | NO                              | 10                                                                               | -                                                                                          | -                                                                                | NO                                                                      | -                                                                                           | -                                                                                | -                                                                               | -                                                                                | -                                                                | NO                                                                | NO                                                         | NO                                                          | NO                                                         | 0.5                                                         | 0.5                                           | 0.2                                                                          | NO                                            | NO                                                         |
| 30v49      | NO                              | 10                                                                               | -                                                                                          | -                                                                                | NO                                                                      | -                                                                                           | -                                                                                | -                                                                               | -                                                                                | -                                                                | NO                                                                | NO                                                         | NO                                                          | NO                                                         | 0.5                                                         | 0.5                                           | 0.2                                                                          | NO                                            | NO                                                         |
| 30v40      | NO                              | 10                                                                               | -                                                                                          | -                                                                                | NO                                                                      | -                                                                                           | -                                                                                | -                                                                               | -                                                                                | -                                                                | NO                                                                | NO                                                         | NO                                                          | NO                                                         | 0.5                                                         | 0.5                                           | 0.2                                                                          | NO                                            | NO                                                         |
| 30v41      | NO                              | 10                                                                               | -                                                                                          | -                                                                                | NO                                                                      | -                                                                                           | -                                                                                | -                                                                               | -                                                                                | -                                                                | NO                                                                | NO                                                         | NO                                                          | NO                                                         | 0.5                                                         | 0.5                                           | 0.2                                                                          | NO                                            | NO                                                         |
| 30v42      | NO                              | 10                                                                               | -                                                                                          | -                                                                                | NO                                                                      | -                                                                                           | -                                                                                | -                                                                               | -                                                                                | -                                                                | NO                                                                | NO                                                         | NO                                                          | NO                                                         | 0.5                                                         | 0.5                                           | 0.2                                                                          | NO                                            | NO                                                         |
| 30v43      | NO                              | 10                                                                               | -                                                                                          | -                                                                                | NO                                                                      | -                                                                                           | -                                                                                | -                                                                               | -                                                                                | -                                                                | NO                                                                | NO                                                         | NO                                                          | NO                                                         | 0.5                                                         | 0.5                                           | 0.2                                                                          | NO                                            | NO                                                         |
| 30v44      | NO                              | 10                                                                               | -                                                                                          | -                                                                                | NO                                                                      | -                                                                                           | -                                                                                | -                                                                               | -                                                                                | -                                                                | NO                                                                | NO                                                         | NO                                                          | NO                                                         | 0.5                                                         | 0.5                                           | 0.2                                                                          | NO                                            | NO                                                         |
| 30v45      | NO                              | 10                                                                               | -                                                                                          | -                                                                                | NO                                                                      | -                                                                                           | -                                                                                | -                                                                               | -                                                                                | -                                                                | NO                                                                | NO                                                         | NO                                                          | NO                                                         | 0.5                                                         | 0.5                                           | 0.2                                                                          | NO                                            | NO                                                         |
| 30v46      | NO                              | 10                                                                               | -                                                                                          | -                                                                                | NO                                                                      | -                                                                                           | -                                                                                | -                                                                               | -                                                                                | -                                                                | NO                                                                | NO                                                         | NO                                                          | NO                                                         | 0.5                                                         | 0.5                                           | 0.2                                                                          | NO                                            | NO                                                         |
| 30v47      | NO                              | 10                                                                               | -                                                                                          | -                                                                                | NO                                                                      | -                                                                                           | -                                                                                | -                                                                               | -                                                                                | -                                                                | NO                                                                | NO                                                         | NO                                                          | NO                                                         | 0.5                                                         | 0.5                                           | 0.2                                                                          | NO                                            | NO                                                         |
| 30v48      | NO                              | 10                                                                               | -                                                                                          | -                                                                                | NO                                                                      | -                                                                                           | -                                                                                | -                                                                               | -                                                                                | -                                                                | NO                                                                | NO                                                         | NO                                                          | NO                                                         | 0.5                                                         | 0.5                                           | 0.2                                                                          | NO                                            | NO                                                         |
| 30v49      | NO                              | 10                                                                               | -                                                                                          | -                                                                                | NO                                                                      | -                                                                                           | -                                                                                | -                                                                               | -                                                                                | -                                                                | NO                                                                | NO                                                         | NO                                                          | NO                                                         | 0.5                                                         | 0.5                                           | 0.2                                                                          | NO                                            | NO                                                         |
| 30v40      | NO                              | 10                                                                               | -                                                                                          | -                                                                                | NO                                                                      | -                                                                                           | -                                                                                | -                                                                               | -                                                                                | -                                                                | NO                                                                | NO                                                         | NO                                                          | NO                                                         | 0.5                                                         | 0.5                                           | 0.2                                                                          | NO                                            | NO                                                         |
| 30v41      | NO                              | 10                                                                               | -                                                                                          | -                                                                                | NO                                                                      | -                                                                                           | -                                                                                | -                                                                               | -                                                                                | -                                                                | NO                                                                | NO                                                         | NO                                                          | NO                                                         | 0.5                                                         | 0.5                                           | 0.2                                                                          | NO                                            | NO                                                         |
| 30v42      | NO                              | 10                                                                               | -                                                                                          | -                                                                                | NO                                                                      | -                                                                                           | -                                                                                | -                                                                               | -                                                                                | -                                                                | NO                                                                | NO                                                         | NO                                                          | NO                                                         | 0.5                                                         | 0.5                                           | 0.2                                                                          | NO                                            | NO                                                         |
| 30v43      | NO                              | 10                                                                               | -                                                                                          | -                                                                                | NO                                                                      | -                                                                                           | -                                                                                | -                                                                               | -                                                                                | -                                                                | NO                                                                | NO                                                         | NO                                                          | NO                                                         | 0.5                                                         | 0.5                                           | 0.2                                                                          | NO                                            | NO                                                         |
| 30v44      | NO                              | 10                                                                               | -                                                                                          | -                                                                                | NO                                                                      | -                                                                                           | -                                                                                | -                                                                               | -                                                                                | -                                                                | NO                                                                | NO                                                         | NO                                                          | NO                                                         | 0.5                                                         | 0.5                                           | 0.2                                                                          | NO                                            | NO                                                         |
| 30v45      | NO                              | 10                                                                               | -                                                                                          | -                                                                                | NO                                                                      | -                                                                                           | -                                                                                | -                                                                               | -                                                                                | -                                                                | NO                                                                | NO                                                         | NO                                                          | NO                                                         | 0.5                                                         | 0.5                                           | 0.2                                                                          | NO                                            | NO                                                         |
| 30v46      | NO                              | 10                                                                               | -                                                                                          | -                                                                                | NO                                                                      | -                                                                                           | -                                                                                | -                                                                               | -                                                                                | -                                                                | NO                                                                | NO                                                         | NO                                                          | NO                                                         | 0.5                                                         | 0.5                                           | 0.2                                                                          | NO                                            | NO                                                         |
| 30v47      | NO                              | 10                                                                               | -                                                                                          | -                                                                                | NO                                                                      | -                                                                                           | -                                                                                | -                                                                               | -                                                                                | -                                                                | NO                                                                | NO                                                         | NO                                                          | NO                                                         | 0.5                                                         | 0.5                                           | 0.2                                                                          | NO                                            | NO                                                         |
| 30v48      | NO                              | 10                                                                               | -                                                                                          | -                                                                                | NO                                                                      | -                                                                                           | -                                                                                | -                                                                               | -                                                                                | -                                                                | NO                                                                | NO                                                         | NO                                                          | NO                                                         | 0.5                                                         | 0.5                                           | 0.2                                                                          | NO                                            | NO                                                         |
| 30v49      | NO                              | 10                                                                               | -                                                                                          | -                                                                                | NO                                                                      | -                                                                                           | -                                                                                | -                                                                               | -                                                                                | -                                                                | NO                                                                | NO                                                         | NO                                                          | NO                                                         | 0.5                                                         | 0.5                                           | 0.2                                                                          | NO                                            | NO                                                         |
| 30v40      | NO                              | 10                                                                               | -                                                                                          | -                                                                                | NO                                                                      | -                                                                                           | -                                                                                | -                                                                               | -                                                                                | -                                                                | NO                                                                | NO                                                         | NO                                                          | NO                                                         | 0.5                                                         | 0.5                                           | 0.2                                                                          | NO                                            | NO                                                         |
| 30v41      | NO                              | 10                                                                               | -                                                                                          | -                                                                                | NO                                                                      | -                                                                                           | -                                                                                | -                                                                               | -                                                                                | -                                                                | NO                                                                | NO                                                         | NO                                                          | NO                                                         | 0.5                                                         | 0.5                                           | 0.2                                                                          | NO                                            | NO                                                         |
| 30v42      | NO                              | 10                                                                               | -                                                                                          | -                                                                                | NO                                                                      | -                                                                                           | -                                                                                | -                                                                               | -                                                                                | -                                                                | NO                                                                | NO                                                         | NO                                                          | NO                                                         | 0.5                                                         | 0.5                                           | 0.2                                                                          | NO                                            | NO                                                         |
| 30v43      | NO                              | 10                                                                               | -                                                                                          | -                                                                                | NO                                                                      | -                                                                                           | -                                                                                | -                                                                               | -                                                                                | -                                                                | NO                                                                | NO                                                         | NO                                                          | NO                                                         | 0.5                                                         | 0.5                                           | 0.2                                                                          | NO                                            | NO                                                         |
| 30v44      | NO                              | 10                                                                               | -                                                                                          | -                                                                                | NO                                                                      | -                                                                                           | -                                                                                |                                                                                 |                                                                                  |                                                                  |                                                                   |                                                            |                                                             |                                                            |                                                             |                                               |                                                                              |                                               |                                                            |









**Supplementary Table 2 continued. Summary of antibody discovery approaches and characterization assays.**

|          |             |    |     |     |         |   |    |   |   |    |    |     |     |       |       |     |     |     |       |     |
|----------|-------------|----|-----|-----|---------|---|----|---|---|----|----|-----|-----|-------|-------|-----|-----|-----|-------|-----|
| ZIKV-001 | Sub-panel 1 | 12 | 3.2 | 1.2 | ND      | + | ND | + | + | +  | +  | ND  | 97  | ND    | 1,666 | 0.0 | 1.1 | 2.1 | ND    | ND  |
| ZIKV-002 | Sub-panel 1 | 4  | -   | -   | ND      | - | ND | - | - | ND | ND | ND  | ND  | ND    | ND    | 2.2 | 2.4 | 2.4 | ND    | ND  |
| ZIKV-003 | Sub-panel 1 | 24 | -   | -   | ND      | - | ND | - | - | ND | ND | ND  | ND  | ND    | ND    | 2.3 | 2.4 | 2.4 | ND    | ND  |
| ZIKV-004 | Sub-panel 1 | 42 | -   | -   | ND      | - | ND | - | - | ND | ND | ND  | ND  | ND    | ND    | 2.3 | 2.4 | 2.4 | ND    | ND  |
| ZIKV-005 | Sub-panel 1 | 42 | -   | -   | ND      | - | ND | - | - | ND | ND | ND  | ND  | ND    | ND    | 2.3 | 2.4 | 2.4 | ND    | ND  |
| ZIKV-006 | Sub-panel 1 | 48 | 4.0 | 3.5 | 117     | + | ND | + | + | +  | +  | 42  | 75  | 334   | 294   | 1.0 | 2.1 | 2.1 | 129   | 138 |
| ZIKV-007 | Sub-panel 1 | 24 | 3.8 | 2.2 | Unknown | + | ND | + | + | +  | +  | 382 | 202 | 1,820 | 534   | 0.5 | 0.9 | 1.4 | 1,100 | 426 |
| ZIKV-008 | Sub-panel 1 | 24 | -   | -   | ND      | - | ND | - | - | ND | ND | ND  | ND  | ND    | ND    | 2.3 | 2.4 | 2.4 | ND    | ND  |
| ZIKV-009 | Sub-panel 1 | 12 | 4.0 | 3.6 | ND      | - | ND | - | - | ND | ND | ND  | ND  | ND    | ND    | 2.0 | 2.1 | 2.2 | ND    | ND  |
| ZIKV-010 | Sub-panel 1 | 24 | -   | -   | ND      | - | ND | - | - | ND | ND | ND  | ND  | ND    | ND    | 1.5 | 0.9 | 0.9 | ND    | ND  |
| ZIKV-011 | Sub-panel 1 | 24 | -   | -   | ND      | - | ND | - | - | ND | ND | ND  | ND  | ND    | ND    | 1.4 | 2.0 | 2.0 | ND    | ND  |
| ZIKV-012 | Sub-panel 1 | 24 | -   | -   | ND      | - | ND | - | - | ND | ND | ND  | ND  | ND    | ND    | 1.4 | 2.0 | 2.0 | ND    | ND  |

\* mAbs were isolated by indicated B cell labeling and sorting approach. Sub-panel 1 - labeling with biotinylated E; Sub-panel 2 - labeling with intact E followed by detection with fusion loop-specific mAb; labeling and detection is the same as for Sub-panel 2 and sorting of high-affinity population only. ND – not determined when cells were pooled from different sorting approaches for the analysis.

\*\* Total volume of each purified mAb was 100 µL. The limit of IgG detection was 5 µg/mL, and the amount mAbs that could not be detected by the assay used is indicated as <0.5 µg.

\*\*\* O.D. 450 nm of 0.3 (three-fold over the negative control) was set as a threshold for mAb reactivity, and non-reactive mAbs are indicated with "-" symbol.

\*\*\*\* mAbs of known epitope specificity included ZIKV-88 (recognizes FL), ZIKV-116 (recognizes DIII), and ZIKV-117 (recognizes DII) as from a previous report<sup>1</sup>.

\*\*\*\*\* Each mAb was tested in a single dilution from micro-scale purified samples and mAb concentration was not normalized. Z-score ( $z$ ) =  $(x-\mu)/\sigma$ , where  $x$  is raw score that determined as described in the **Methods**,  $\mu$  is the mean of the population, and  $\sigma$  is the standard deviation of the population.

ND - not determined. "-" symbol indicates neutralizing activity was not detected at the highest tested mAb concentration, 3,000 ng/mL.

**Supplementary Table 3. Inferred antibody germline genes and variable region analysis of selected lead candidates that tested *in vivo* in mice.**

| mAb clone | Heavy chain variable gene sequence |                   |                   |                          |                              | Light chain variable gene sequence |                   |                          |                              |
|-----------|------------------------------------|-------------------|-------------------|--------------------------|------------------------------|------------------------------------|-------------------|--------------------------|------------------------------|
|           | V-gene and allele                  | D-gene and allele | J-gene and allele | CDR3 amino acid sequence | Percent identity of germline | V-gene and allele                  | J-gene and allele | CDR3 amino acid sequence | Percent identity of germline |
| ZIKV-423  | 3-23*01                            | 3-10*01           | 4*02              | AKDRTSGGFGELFKH          | 89                           | 1-5*03                             | 1*01              | QHYHSYPWT                | 95                           |
| ZIKV-434  | 3-48*03                            | 3-3*01            | 4*02              | ARDRYDFWSGDPMGYFDY       | 92                           | 1-5*03                             | 1*01              | QQYNRGSWT                | 94                           |
| ZIKV-518  | 2-5*01                             | 6-13*01           | 5*02              | AHTVLVSRNWYVLNWFDP       | 97                           | 2-14*01                            | 1*01              | QVWDDSSDQWV              | 98                           |
| ZIKV-608  | 3-23*04                            | 3-10*01           | 4*02              | AKDRPSLGVGELYDY          | 91                           | 1-5*03                             | J1*01             | QQYNSYPWT                | 100                          |
| ZIKV-609  | 3-23*01                            | 6-19*01           | 4*02              | AKDHPQWLGSHE             | 94                           | 3-21*02                            | J1*01             | QVWDSTRDQYV              | 98                           |
| ZIKV-624  | 3-11*05                            | 2-2*02            | 6*03              | ARDRLTYPPYHYMDV          | 98                           | 1-44*01                            | J3*02             | AAWDDSLNGRV              | 98                           |
| ZIKV-635  | 3-30*18                            | 6-13*01           | 3*02              | AKDSAGRWRQQLSAGI         | 97                           | 2-28*01                            | J1*01             | MQALQTPWT                | 99                           |
| ZIKV-652  | 3-23*01                            | 6-19*01           | 4*02              | AKVIDQWLGFYD             | 97                           | 3-21*02                            | J3*02             | QVWDDSSDQWV              | 99                           |
| ZIKV-668  | 3-49*05                            | 3/15-3a*01        | 5*02              | TRDFNDFWTGHHPNWFDP       | 98                           | 1-39*01                            | 1*01              | QQSYSIPRT                | 99                           |
| ZIKV-681  | 3-23*04                            | 3-10*01           | 4*02              | AKDRVVRGVGENLDH          | 89                           | 1-27*01                            | 1*01              | QKYNSVPWT                | 92                           |
| ZIKV-682  | 3-30*18                            | 1-26*01           | 4*02              | AKEREWVVRDGGFDY          | 97                           | 3-21*02                            | 2*01              | QVWHSNTDHVV              | 98                           |
| ZIKV-684  | 3-73*01                            | 3-22*01           | 4*02              | IRQGGYSESEFDY            | 96                           | 1-40*01                            | 2*01              | QSYDSSLTVHVV             | 98                           |
| ZIKV-752  | 1-8*01                             | 6-19*01           | 6*02              | ARVTSGSSYGTTYYYAMDV      | 96                           | 1-47*01                            | 3*02              | ASWDDRLSGSWV             | 97                           |
| ZIKV-869  | 3-13*01                            | 2-2*01            | 6*02              | ARVAHHSEYHLLYMPHGMDV     | 96                           | 2-23*01                            | 3*02              | CSYTDNSPYVL              | 97                           |
| ZIKV-893  | 3-30*18, 3-30-5*01                 | 3-16*02           | 4*02              | AKVGSHYYDIWGTYYRRFDY     | 97                           | 1-39*01                            | 3*01              | QQYGSSPPVT               | 100                          |
| ZIKV-922  | 3-23*04                            | 3-10*01           | 4*02              | AKDRPSRGGVGEYDY          | 92                           | 1-5*03                             | J1*01             | QQYLSYPWT                | 95                           |
| ZIKV-940  | 4-59*01                            | 6-19*01           | 4*02              | ARDCASGWDGCFD            | 96                           | 1-44*01                            | 1*01              | AAWDDSLNGYV              | 99                           |
| ZIKV-980  | 3-30*04                            | 6-19*01           | 6*02              | VRDRKVAGQMIRHGMDV        | 96                           | 8-61*01                            | 3*02              | TLYMGSGISV               | 98                           |
| ZIKV-1006 | 3-33*01                            | 3-10*01           | 3*02              | ARVGVGADDAFDI            | 94                           | 3-21*02                            | 3*02              | QVWDSNSDHGV              | 97                           |
| ZIKV-1007 | 3-9*01                             | 4-17*01           | 4*02              | AKTKAYGDFHFDY            | 97                           | 3-21*02                            | 2*01              | QLWDTSSNPHVV             | 98                           |

**Supplementary Table 4. Efficacy of mAb-encoding RNA formulation and IgG protein treatment against ZIKV *in vivo* in mice.**

| mAb clone               | Prophylactic RNA treatment, # survived/treated mice (% survival) | IgG protein treatment, # survived/treated mice (% survival) |              |            |            |           |                                 |            |            |
|-------------------------|------------------------------------------------------------------|-------------------------------------------------------------|--------------|------------|------------|-----------|---------------------------------|------------|------------|
|                         |                                                                  | Prophylaxis dose per mouse, d-1                             |              |            |            |           | Treatment dose per mouse, 1 dpi |            |            |
|                         |                                                                  | 70 µg                                                       | 9 µg         | 4.5 µg     | 2 µg       | 1 µg      | 9 µg                            | 4.5 µg     |            |
| ZIKV-423                | 2/5 (40%)                                                        | ND                                                          | ND           | ND         | ND         | ND        | ND                              | ND         | ND         |
| ZIKV-434                | 5/5 (100%)                                                       | 1/5 (20%)                                                   | ND           | ND         | ND         | ND        | ND                              | ND         | ND         |
| ZIKV-518                | 0/5(0%)                                                          | ND                                                          | ND           | ND         | ND         | ND        | ND                              | ND         | ND         |
| ZIKV-608                | 0/5 (0%)                                                         | ND                                                          | ND           | ND         | ND         | ND        | ND                              | ND         | ND         |
| ZIKV-609                | 5/5 (100%)                                                       | ND                                                          | 2/5 (40%)    | ND         | ND         | ND        | ND                              | ND         | ND         |
| ZIKV-624                | 5/5 (100%)                                                       | ND                                                          | 3/5 (60%)    | ND         | ND         | ND        | ND                              | ND         | ND         |
| ZIKV-635                | 5/5 (100%)                                                       | 5/5 (100%)                                                  | 5/5 (100%)   | ND         | ND         | ND        | ND                              | ND         | ND         |
| ZIKV-652                | 5/5 (100%)                                                       | ND                                                          | ND           | ND         | ND         | ND        | ND                              | ND         | ND         |
| ZIKV-668                | 5/5 (100%)                                                       | 4/5 (80%)                                                   | 5/5 (100%)   | ND         | ND         | ND        | ND                              | ND         | ND         |
| ZIKV-681                | 2/5 (40%)                                                        | ND                                                          | ND           | ND         | ND         | ND        | ND                              | ND         | ND         |
| ZIKV-682                | 4/5 (80%)                                                        | ND                                                          | ND           | ND         | ND         | ND        | ND                              | ND         | ND         |
| ZIKV-684                | 5/5 (100%)                                                       | ND                                                          | ND           | ND         | ND         | ND        | ND                              | ND         | ND         |
| ZIKV-752                | 4/5 (80%)                                                        | 5/5 (100%)                                                  | 11/14 (79%)  | 7/9 (78%)  | 2/4 (50%)  | 2/4 (50%) | 3/5 (60%)                       | 3/5 (60%)  | 3/5 (60%)  |
| ZIKV-869                | 2/5 (40%)                                                        | ND                                                          | 4/5 (80%)    | ND         | ND         | ND        | ND                              | ND         | ND         |
| ZIKV-893                | 5/5 (100%)                                                       | 5/5 (100%)                                                  | 14/14 (100%) | 4/4 (100%) | 4/4 (100%) | 0/4 (0%)  | 5/5 (100%)                      | 4/5 (80%)  | 4/5 (80%)  |
| ZIKV-922                | 0/5 (0%)                                                         | ND                                                          | ND           | ND         | ND         | ND        | ND                              | ND         | ND         |
| ZIKV-940                | 5/5 (100%)                                                       | ND                                                          | 9/13 (69%)   | 3/4 (75%)  | 2/4 (50%)  | 2/4 (50%) | 5/5 (100%)                      | 4/5 (80%)  | 4/5 (80%)  |
| ZIKV-980                | 1/5 (20%)                                                        | ND                                                          | 0/5 (0%)     | ND         | ND         | ND        | ND                              | ND         | ND         |
| ZIKV-1006               | 0/5 (0%)                                                         | ND                                                          | 1/5 (20%)    | ND         | ND         | ND        | ND                              | ND         | ND         |
| ZIKV-1007               | 0/5 (0%)                                                         | ND                                                          | ND           | ND         | ND         | ND        | ND                              | ND         | ND         |
| <b>ZIKV-117 control</b> | 5/5 (100%)                                                       | ND                                                          | 14/14 (100%) | 9/9 (100%) | 3/4 (75%)  | 0/4 (0%)  | 4/5 (80%)                       | 5/5 (100%) | 5/5 (100%) |
| <b>FLU-5J8 control</b>  | 1/5 (0%)                                                         | 2/5 (40%)                                                   | 0/5 (0%)     | ND         | ND         | ND        | 1/5 (20%)                       | 1/5 (20%)  | 1/5 (20%)  |
| <b>PBS control</b>      | 1/5 (0%)                                                         | ND                                                          | ND           | 1/4 (25%)  | 1/4 (25%)  | 1/4 (25%) | ND                              | ND         | ND         |

**References for Supplementary Information.**

1. Sapparapu, G. *et al.* Neutralizing human antibodies prevent Zika virus replication and fetal disease in mice. *Nature* **540**, 443-447 (2016).
